# Supplementary material for: Ferrous and manganese oxalate for efficient heterogenous-Fenton degradation of organic pollutants: composite active site and mechanism perception
Source: publisher site journal article supplement (doi:10.1515/ijcre-2023-0024), 2023-05-22
Supplement: Supplementary file 1 [file j_ijcre-2023-0024_suppl_001.docx]

***Supplementary data***

**Ferrous and manganese oxalate composite catalyst for efficient heterogenous-Fenton degradation of organic pollutants**

Liumi Deng1, Hao Ren1, Lu Fu1, Meng Liao1, Xiang Zhou1, Shaohua Chen1,*, Hua Wang1**, Luoxin Wang1

1 Key Laboratory for New Textile, Materials and Applications of Hubei Province, College of Materials Science and Engineering, Wuhan Textile University, Wuhan, 430200, China.

E-mail addresses: [shaohuachen@foxmail.com, huawangabc@163.com](mailto:shaohuachen@foxmail.com,%20huawangabc@163.com).

**
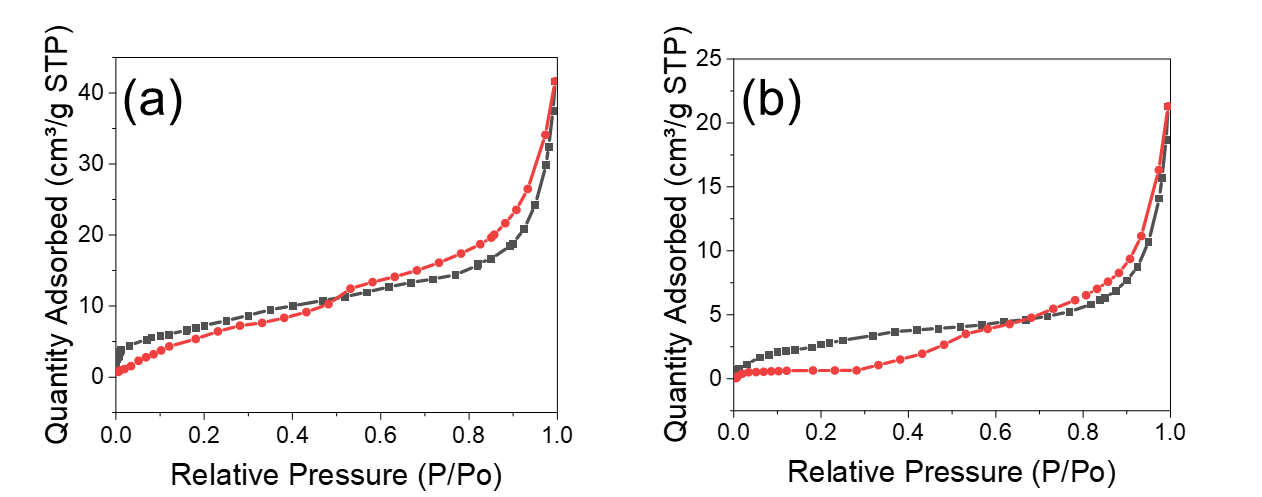
**

**Fig. S1.** BET analysis of MnC2O4 (a) and 6-1FeMn after 1 cycle (b).


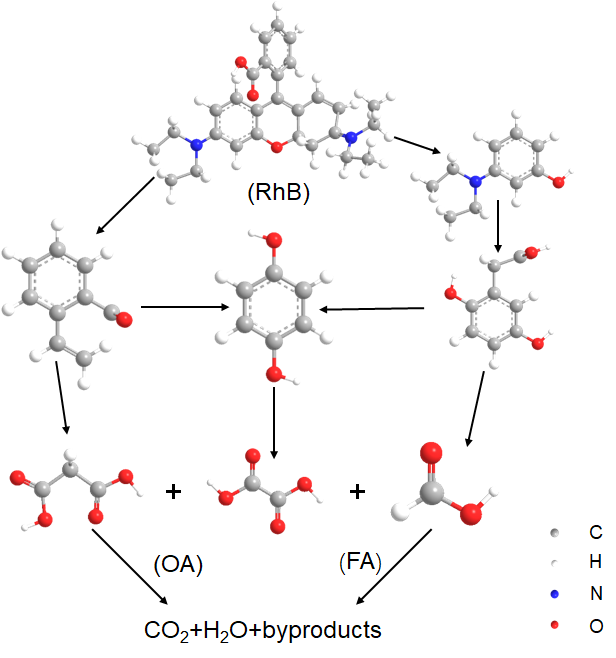


**Fig. S2.** Schematic diagram of the degradation mechanism of RhB(Diao et al. 2017).

**Table S1.** Structural parameters of MnC2O4, 6-1FeMn, FeC2O4.

| Samples | SBET (m2/g) | Average Pore Size (nm) |
| --- | --- | --- |
| MnC2O4 | 50.03 | 9.06 |
| 6-1FeMn | 27.47 | 9.38 |
| FeC2O4 | 23.63 | 6.86 |

**Table S2.** Structural parameters of fresh 6-1FeMn and 6-1FeMn after 1 cycle

| Samples | SBET (m2/g) | Average Pore Size (nm) |
| --- | --- | --- |
| Fresh 6-1FeMn | 27.47 | 9.38 |
| 6-1FeMn after 1 cycle | 10.71 | 12.29 |

**References**

Diao, Z.-H., Liu, J.-J., Hu, Y.-X., Kong, L.-J., Jiang, D. & Xu, X.-R. (2017) Comparative study of Rhodamine B degradation by the systems pyrite/H 2 O 2 and pyrite/persulfate: Reactivity, stability, products and mechanism. *Separation and Purification Technology,* 184**,** 374-383.
